# Supplementary material for: Procyanidin A2 Modulates IL-4-Induced CCL26 Production in Human Alveolar Epithelial Cells
Source: MDPI journal article supplement (doi:10.3390/ijms17111888), 2016-11-12
Supplement: s1 [file s1]

# Supplementary Material: Procyanidin A2 Modulates IL-4-Induced CCL26 Production in Human Alveolar Epithelial Cells

Sara L. Coleman, Marlena C. Kruger, Gregory M. Sawyer and Roger D. Hurst

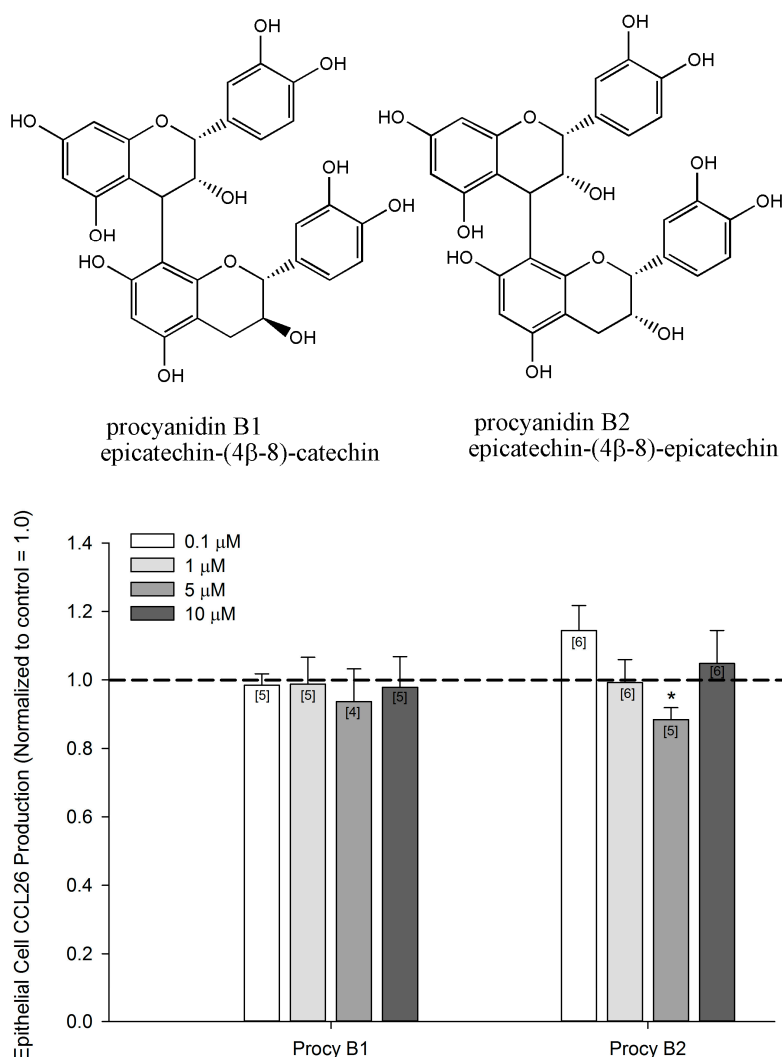

**Figure S1.** Procyanidin B1 and B2 effects on IL-4-stimulated CCL26 production. A549 cells were seeded at  $5 \times 10^5$  in 12-well plates, serum starved for 24 h and incubated with control DMSO or a range of procyanidin B1 (procy B1) and procyanidin B2 (procy B2) concentrations for 6 h, washed and then stimulated with 5 ng/mL IL-4 for 24 h. Collected supernatants were measured for CCL26 by ELISA. Results are expressed as mean  $\pm$  SEM normalized to control = 1.0,  $n = 4$ –6 separate experiments. Brackets, [n] indicate number of experiments for each data point. \*  $p < 0.05$ . 5  $\mu$ M procyanidin B2 reduced CCL26 production 12% compared to control.
